# Supplementary material for: Enthesis regeneration: a role for Gli1+ progenitor cells
Source: Oxford University Press journal article supplement (doi:10.1242/dev.139303), 2017-02-21
Supplement: dev139303supp.pdf [file dev139303supp.pdf]

## Enthesis regeneration: A role for Gli1+ progenitor cells

### - SUPPLEMENTAL FIGURES -

Andrea G. Schwartz<sup>1</sup>  
Leesa M. Galatz<sup>2</sup>  
Stavros Thomopoulos<sup>\*,3,4</sup>

<sup>1</sup>Department of Orthopaedic Surgery  
Washington University, St. Louis, MO

<sup>2</sup>Department of Orthopaedic Surgery  
Icahn School of Medicine at Mount Sinai Hospital  
Mount Sinai Health System, New York, NY

\*Corresponding author

<sup>3</sup>Department of Orthopedic Surgery

<sup>4</sup>Department of Biomedical Engineering  
Columbia University, New York, NY 10032  
sat2@columbia.edu

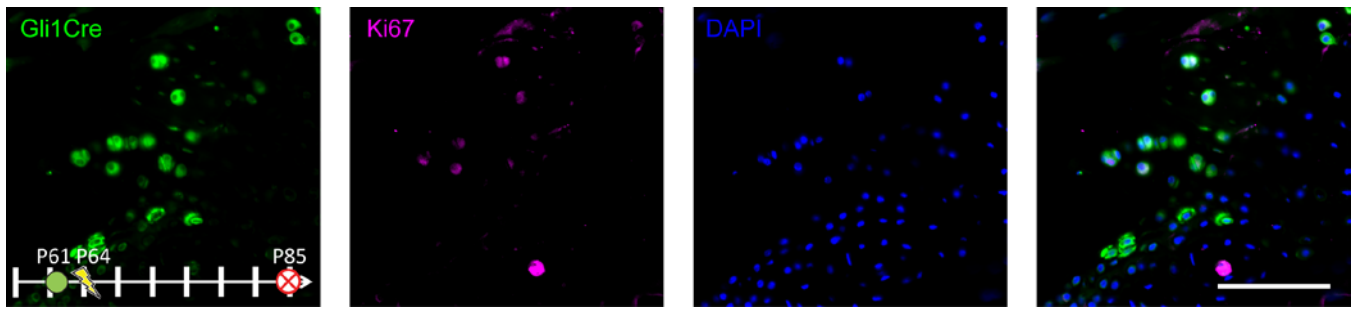

**Figure S1.** Ki67 staining (purple) was associated with clusters of Gli1Cre<sup>ERT2</sup>-positive cells (green) at the mature healing enthesis, demonstrating that the small number of Gli1+ cells that remain in the mature enthesis were able to respond to injury. Scale = 100  $\mu$ m.

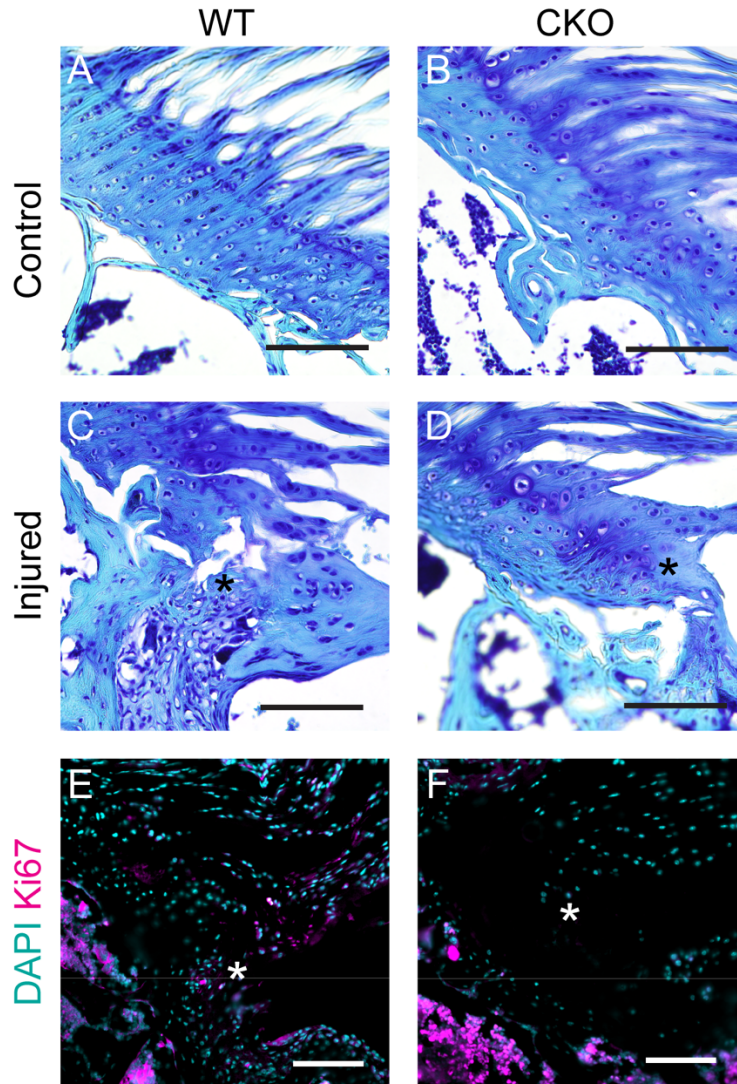

**Figure S2.** ScxCre mice were crossed with  $Smo^{fl/fl}$  mice to delete Hh signaling in tendon and enthesis cells. Adult ScxCre; $Smo^{fl/fl}$  mice (CKO; B,D,F) had impaired healing and a reduction of enthesis cellularity 6 weeks after injury sustained on P42 compared to wild type (WT) mice (A,C,E). Ki67 staining was reduced in CKO mice compared to WT mice. Scale = 100  $\mu$ m., N=7-8 per group.
